# Supplementary material for: FGFR1:TACC1 fusion is a frequent event in molecularly defined extraventricular neurocytoma
Source: Springer Nature journal article supplement (doi:10.1007/s00401-018-1882-3), 2018-07-05
Supplement: MOESM3 [file 15911028]

Supplementary Table 2 Structural variations identified in RNA-seq

| **Sample #** | **Gen A** | **Chr A** | **Pos A** | **Exon A** | **Gen B** | **Chr B** | **Pos B** | **Exon B** |
| --- | --- | --- | --- | --- | --- | --- | --- | --- |
| 1 | FGFR3 | 4 | 1808649 | 17 | TACC3 | 4 | 1732977 | 7 |
| 3 | FGFR1 | 8 | 38271411 | 18 | TACC1 | 8 | 38691744 | 7 |
| 6 | FGFR1 | 8 | 38271436 | 18 | TACC1 | 8 | 38693680 | 7 |
| 8 | FGFR1 | 8 | 38271436 | 18 | TACC1 | 8 | 38693680 | 7 |
| 14 | FGFR1 | 8 | 38271436 | 18 | TACC1 | 8 | 38693680 | 7 |
| 16 | FGFR1 | 8 | 38271436 | 18 | TACC1 | 8 | 38693680 | 7 |
| 17 | FGFR1 | 8 | 38271436 | 18 | TACC1 | 8 | 38693680 | 7 |
| 18 | FGFR1 | 8 | 38271436 | 18 | TACC1 | 8 | 38693680 | 7 |
| 19 | FGFR1 | 8 | 38271436 | 18 | TACC1 | 8 | 38693680 | 7 |
| 22 | FGFR1 | 8 | 38271436 | 18 | EVI5 | 1 | 93101893 | 12 |
| 25 | FGFR1 | 8 | 38271255 | 18 | TACC1 | 8 | 38689737 | 6 |
